# Supplementary material for: Giant nonlinearity in epitaxial graphene moiré superlattices for RF energy harvesting
Source: Research Square preprint supplement (doi:10.21203/rs.3.rs-7085535/v1), 2025-07-17
Supplement: Supplementary file 1 [file 18d61244e4dd8c6116801157.docx]

**Supplementary Note 1: Symmetry breaking and second-harmonic generation in Gr- Ge(110) moiré heterostructure**

Optical second-harmonic generation (SHG) exhibits exceptional sensitivity to crystal structural symmetry and occurs exclusively in non-centrosymmetric materials1, making it an ideal probe to investigate symmetry properties in mixed-dimensional Gr-Ge(110) heterostructures. The inversion symmetry-breaking effect in epitaxial Gr-Ge(110) heterostructures manifest through the emergence of optical second-harmonic generation, as demonstrated in **Fig. 1j** and **Extended Data Fig. 2**. In contrast, monolayer graphene transferred onto the SiO2/Si substrate exhibits a negligible SHG response due to the centrosymmetric lattice structure of quasi-free-standing graphene, wherein the inversion center at the hollow sites of the hexagonal lattice (**Extended Data Fig. 2a**).

The SHG intensity for epitaxial Gr-Ge(110) heterostructure exhibits a linear dependence on the incidence power when analyzed on a double-logarithmic scale (**Extended Data Fig. 2b**). Linear fitting yields a slope of 1.903 ± 0.02, unambiguously confirming the SHG process. Anisotropic polarization-dependent SHG measurements reveal the predicted *C*1v symmetry (**Fig. 1j)**2,3. Remarkably, the optical second-order susceptibility χ2 value of 1,102 pm V-1 for the Gr-Ge(110) moiré heterostructure substantially exceeds those reported for MoS24, WS24 and LiNbO31 (**Extended Data Fig. 2c**), primarily due to its low-symmetry.

**Supplementary Note 2: Scaling analysis of the NLHE for Gr-Ge moiré heterostructure**

To perform the scaling and understand underlying mechanisms of the nonlinear Hall effect (NLHE) in Gr/Ge (110) heterostructure, ,  and are measured simultaneously at a 5 μA a.c. stimulation at different temperatures. The measured first-harmonic longitudinal voltage is plotted in **Extended Data Fig. 6a**. The second-order nonlinear Hall () and longitudinal () electric field are calculated, respectively, according to the relationship and to account for different device dimensions, where *W* = 20 μm and *L* = 50 μm are the transverse and longitudinal dimensions of the Hall bar device. The temperature-dependent behavior of and  is illustrated in **Extended Data Fig. 6b**. Both and exhibit the same temperature dependence characterized by a peak at around 250 K and suppression at a lower temperature. This non-monotonic behavior excludes the heating effect as the dominant mechanism, since such effects typically become more substantial at a low temperature. The NLHE strength5, defined as , exhibits a similar temperature dependence versus the linear conductivity (**Extended Data Fig. 6c**), suggesting a potential correlation between the NLHE strength and .

To explicitly demonstrate this relationship, versus is plotted on log-log scales in the main panel of **Fig. 2c**. The data show excellent agreement with the power-law formula , where the exponent  is pronouncedly temperature-dependent, which approaches saturation at at elevated temperatures () as illustrated in the inset of **Fig. 2c**. Below a critical conductivity (), increases monotonically above 2, resulting in accelerated growth. Consequently, can be approximately linearly fitted with  in region:

(1)

where A and B are constants. The slope term A quantifies the contributions from extrinsic skew-scattering mechanisms, while the intercept term B captures the intrinsic contributions, such as Berry curvature dipole (BCD) or extrinsic side-jump effects that remain independent of the longitudinal conductivity6–8. The side-jump contribution is usually neglected for the clean sample with high-conductivity such as graphene systems9–11. The extracted A = 3.3×108 μm V-1 Ω2 and B = 134 μm V-1 demonstrate that the extrinsic skew-scattering dominates over other possible mechanisms at higher temperature, driving the room-temperature NLHE in our Gr-Ge(110) heterostructure. At lower temperatures, BCD contributions emerge and become increasingly significant, leading to deviations of **Equation (1)**.

**Supplementary Note 3: Rectification voltage induced by the NLHE**

According to the NLHE theory12,13, the transverse second-order responses inherently involve both double-frequency () and d.c. components in response to an oscillating electric field , where the d.c. component is harnessed for rectification. The d.c. and components can be expressed as and , where is the nonlinear conductivity tensor (). To detect the NLHE experimentally, an a.c. current is applied to the Hall-bar device along -axis and the nonlinear transverse voltage scaling quadratically with is extracted through harmonic measurements. Explicitly, there is

, (2)

where is proportional to the nonlinear conductivity and can be treated as a constant for simplicity. **Equation (2)** can be further expanded as by substituting **Equation (1)** into it:

. (3)

The first and second terms in **Equation (3)** represent the rectified d.c. and out-of-phase components of second-order nonlinear Hall responses, respectively, which indicates that the rectified Hall voltage () is the same as the peak-to-peak value of the second-harmonic voltage (*i.e.* ). It is worth mentioning that is directly recorded from a nanovoltmeter while the second-harmonic voltage measured by a lock-in amplifier in our work is the root-main-square (RMS) value. Consequently, there is

, (4)

which accounts for the constant ratio of shown in the inset of **Fig. 2e**.

**Supplementary Table 1. Comparison of NLHE strength for various material systems**

| Materials | Mechanism | Input current maximum (μA) | Output voltage maximum (μV) | (μm V-1) | RT operation | Reference |
| --- | --- | --- | --- | --- | --- | --- |
| Few-layer WTe2 | Intrinsic and extrinsic | 600 | 30 | 1.4×10-3 @2 K  5.8×10-4 @100 K | No | 6 |
| Bilayer WTe2 | Intrinsic | 1 | 170 | 0.14 @10 K | No | 13 |
| Bilayer MoTe2 | Intrinsic dominated | 97 | 125 | 0.07 @3 K  6.6×10-4 @100 K | No | 14 |
| Td-MoTe2  (c-axis) | Extrinsic | 5000 | 1 | 4×105 @2 K  150 @40 K | No | 5 |
| Strained monolayer WSe2 | Intrinsic | 4.5 | 20 | 0.53 @140 K | No | 15 |
| Bi2Se3 | Extrinsic | 1500 | 20 | 7×10-4 @50 K  4×10-4 @200 K | No | 16 |
| MnBi2Te4 | Intrinsic | 10 | 200 | 1.6 @2 K  1.2 @10 K | No | 17 |
| Corrugated bilayer graphene | Intrinsic | 0.1 | 1 | 10 @3 K  1 @15 K | No | 18 |
| Graphene/hBN superlattice | Extrinsic | 5 | 100 | 200 @1.7 K  0.8 @200 K | No | 10 |
| BP/MnBi2Te4/BP  heterostructure | Intrinsic | 10 | 350 | 0.2 @2 K  0.02 @20 K | No | 19 |
| Twisted bilayer WSe2 | Intrinsic | 0.004 | 50000 | 9500 @1.5 K  0.35 @30 K | No | 20 |
| Twisted bilayer graphene | Extrinsic | 5 | 600 | 50 @1.7 K  4.6 @80 K | No | 9 |
| Twisted bilayer graphene (strained) | Intrinsic and Extrinsic | 0.15 | 10 | 2.2×104 @1.5 K  2×103 @70 K | No | 21 |
| Twisted double bilayer graphene | Intrinsic | 0.1 | 150 | 1.8×104 @1.5 K | No | 22 |
| Twisted bilayer MoS2 | Intrinsic | 0.0015 | 1000 | 533 @70 K  18 @285 K | YES | 23 |
| TaIrTe4 | Intrinsic and extrinsic | 600 | 120 | 25 @2 K  4.5 @300 K | YES | 24 |
| BiTeBr | Extrinsic | 5 | 100 | 7 @20 K  0.5 @300 K | YES | 25 |
| BaMnSb2 | Intrinsic | 200 | 400 | 1.2×103 @200 K  163 @300 K | YES | 26 |
| Te | Extrinsic dominated | 51 | 105 | 0.08 @200 K  0.02 @300 K | YES | 27 |
| Bi | Extrinsic | 60 | 3 | 0.01 @293 K | YES | 28 |
| Pt | Extrinsic | 50 | 80 | 1.65 @175 K  320 @300 K | YES | 29 |
| Epitaxial-Gr/Ge moiré superlattice | Intrinsic and extrinsic | 100 | 15000 | 3.67 @175 K  1487 @300 K | YES | **This work** |

**Supplementary Reference**

1. Boyd, R. W. *Nonlinear Optics* 4th edn (Academic Press, 2020).

2. Wu, S. et al. Polarization photodetectors with configurable polarity transition enabled by programmable ferroelectric-doping patterns. *Nat. Commun.* **15**, 8743 (2024).

3. Song, Y. et al. Second harmonic generation in atomically thin MoTe2. *Adv. Opt. Mater.* **6**, 1701334 (2018).

4. Bredillet, K. et al. Dispersion of the nonlinear susceptibility of MoS2 and WS2 from second-harmonic scattering spectroscopy. *Phys. Rev. B* **102**, 235408 (2020).

5. Tiwari, A. et al. Giant c-axis nonlinear anomalous Hall effect in Td-MoTe2 and WTe2. *Nat. Commun.* **12**, 2049 (2021).

6. Kang, K., Li, T., Sohn, E., Shan, J. & Mak, K. F. Nonlinear anomalous Hall effect in few-layer WTe2. *Nat. Mater.* **18**, 324–328 (2019).

7. Du, Z. Z., Wang, C. M., Li, S., Lu, H.-Z. & Xie, X. C. Disorder-induced nonlinear Hall effect with time-reversal symmetry. *Nat. Commun.* **10**, 3047 (2019).

8. Xiao, C., Zhou, H. & Niu, Q. Scaling parameters in anomalous and nonlinear Hall effects depend on temperature. *Phys. Rev. B* **100**, 161403 (2019).

9. Duan, J. et al. Giant second-order nonlinear Hall effect in twisted bilayer graphene. *Phys. Rev. Lett.* **129**, 186801 (2022).

10. He, P. et al. Graphene moiré superlattices with giant quantum nonlinearity of chiral Bloch electrons. *Nat. Nanotechnol.* **17**, 378-383 (2022).

11. Isobe, H., Xu, S.-Y. & Fu, L. High-frequency rectification via chiral Bloch electrons. *Sci. Adv.* **6**, eaay2497 (2020).

12. Sodemann, I. & Fu, L. Quantum nonlinear Hall effect induced by Berry curvature dipole in time-reversal invariant materials. *Phys. Rev. Lett.* **115**, 216806 (2015).

13. Ma, Q. et al. Observation of the nonlinear Hall effect under time-reversal-symmetric conditions. *Nature* **565**, 337–342 (2019).

14. Ma, T. et al. Growth of bilayer MoTe2 single crystals with strong non-linear Hall effect. *Nat. Commun.* **13**, 5465 (2022).

15. Qin, M.-S. et al. Strain tunable Berry curvature dipole, orbital magnetization and nonlinear Hall Effect in WSe2 monolayer. *Chin. Phys. Lett.* **38**, 017301 (2021).

16. He, P. et al. Quantum frequency doubling in the topological insulator Bi2Se3. *Nat. Commun.* **12**, 698 (2021).

17. Wang, N. et al. Quantum-metric-induced nonlinear transport in a topological antiferromagnet. *Nature* **621**, 487–492 (2023).

18. Ho, S.-C. et al*.* Hall effects in artificially corrugated bilayer graphene without breaking time-reversal symmetry. *Nat. Electron.* **4**, 116–125 (2021).

19. Gao, A. et al. Quantum metric nonlinear Hall effect in a topological antiferromagnetic heterostructure. *Science* **381**, 181–186 (2023).

20. Huang, M. et al. Giant nonlinear Hall effect in twisted bilayer WSe2. *Natl. Sci. Rev.* **10**, nwac232 (2023).

21. Huang, M. et al. Intrinsic nonlinear Hall effect and gate-switchable Berry curvature sliding in twisted bilayer graphene. *Phys. Rev. Lett.* **131**, 066301 (2023).

22. Sinha, S. et al. Berry curvature dipole senses topological transition in a moiré superlattice. *Nat. Phys.* **18**, 765-770 (2022).

23. Wu, F. et al. Giant correlated gap and possible room-temperature correlated states in twisted bilayer MoS2. *Phys. Rev. Lett.* **131**, 256201 (2023).

24. Kumar, D. et al. Room-temperature nonlinear Hall effect and wireless radiofrequency rectification in Weyl semimetal TaIrTe4. *Nat. Nanotechnol.* **16**, 421–425 (2021).

25. Lu, X. F. et al. Nonlinear transport and radio frequency rectification in BiTeBr at room temperature. *Nat. Commun.* **15**, 245 (2024).

26. Min, L. et al. Strong room-temperature bulk nonlinear Hall effect in a spin-valley locked Dirac material. *Nat. Commun.* **14**, 364 (2023).

27. Cheng, B. et al. Giant nonlinear Hall and wireless rectification effects at room temperature in the elemental semiconductor tellurium. *Nat. Commun.* **15**, 5513 (2024).

28. Makushko, P. et al. A tunable room-temperature nonlinear Hall effect in elemental bismuth thin films. *Nat. Electron.* **7**, 207-215 (2024).

29. Min, L. et al*.* Colossal room-temperature non-reciprocal Hall effect. *Nat. Mater.* **23**, 1671-1677 (2024).
